# Supplementary material for: RNA-Seq Analysis of Testes from Mice Exposed to Neodymium Oxide
Source: MDPI journal article supplement (doi:10.3390/toxics11120952), 2023-11-22
Supplement: s1 [file s1]

**Supplementary Materials: Table**  
**Table S1. Primer sequences employed.**

| mRNA      | Sequences                 |
|-----------|---------------------------|
| H2ac19 F  | ACAAGCTGCTGGGCAAAGTGAC    |
| H2ac19 R  | CTTATGGTGGCTCTCCGTCTTCTTG |
| Spp1 F    | AAACACACAGACTTGAGCAATC    |
| Spp1 R    | TTAGGGTCTAGGACTAGCTTGT    |
| Slc34a1 F | CCTGAGGAATCACAGTCTCATT    |
| Slc34a1 R | CCACGAAGATATGGTTGCATT     |
| Nphs1 F   | CATCCAGGAGTGTTCCTTCG      |
| Nphs1 R   | CAGGAACTCTGGAGGGTATAAC    |
| Lpl F     | CCTGATGACGCTGATTTGTAG     |
| Lpl R     | CAATGAAGAGATGAATGGAGCG    |
| Kap F     | TCTCTGTTCAGTGGTTGCCTTAAC  |
| Kap R     | GGAAGCCACAGTCAGACCACAG    |
| Umod F    | ATATTTACAACCTTGACAGCGCC   |
| Umod R    | TGATGTTGGAGTCTGTTTACA     |
| Keg1 F    | AGAAGAGCCAGAAGTTCATTGA    |
| Keg1 R    | TCTGAACAGTGAAGTTAGCCTT    |
| Cyp2e1 F  | CCAACTCTGGACTCCCTTTTAT    |
| Cyp2e1 R  | ACGCCTTGAAATAGTCACTGTA    |
| GAPDH F   | ACAACCTTGGTATCGTGGAAGG    |
| GAPDH R   | GCCATCACGCCACAGTTTC       |

| miRNA          | Sequences                |
|----------------|--------------------------|
| miR-19b-1-5p F | GTTAGTTTTGCAGGTTGCATCC   |
| miR-27b-3p F   | AGGTGCAGAGCTTAGCTGAT     |
| miR-11987 F    | CGAGGAATCTCTGGTGGAGG     |
| miR-128-1-5p F | GTTGGATTGCGGGCCGTAG      |
| miR-466b-5p F  | TCATTAGTGTGAGTATGTGTGTGT |
| U6 F           | CTCGCTTCGGCAGCACATATACT  |
| U6 R           | ACGCTTCACGAATTTGCGTGTC   |

| circRNA           | Sequences                 |
|-------------------|---------------------------|
| mmu_circ_0006286F | TGCTGCGTCCAACATAAACAAC TG |
| mmu_circ_0006286R | GGGCTGCTGGCACTCACATTG     |
| mmu_circ_0003133F | GAGCACGCTATGAGAGATACAGTGG |
| mmu_circ_0003133R | ACCAAACTGCAAGGAGGAAGGAC   |
| mmu_circ_0013551F | CAACAAAGAGGCTGAAGGGAGAGAG |
| mmu_circ_0013551R | GGAGATTGGCAGACGGATGACAG   |
| mmu_circ_0013415F | CAGTCGCCTCGGTGCCTATAATG   |
| mmu_circ_0013415R | GCCATCCTGATCCAGAACCTCATCC |
| mmu_circ_0003030F | CAGTCCCAACCTTTGAGCAATGTC  |
| mmu_circ_0003030R | GCGTAGACCTCCATGCACCAAG    |
| mmu_circ_0000284F | ATGACACCTGAGCAGGAGGAGAC   |
| mmu_circ_0000284R | CTACTCTACTAAGCGGTAACCACTG |
| mmu_circ_0000231R | GCAGTCTCTCATCAGGGCATATCAG |
| mmu_circ_0000231R | ACGGAGGAGTCCAGATCAGCATC   |

| lncRNA              | Sequences                 |
|---------------------|---------------------------|
| lnc Gm31786 F       | AAGCGGCATGATGGTTGGAAGAG   |
| lnc Gm31786 R       | GGGTGTGGCAGTAAAGGTGAAC TC |
| lnc 4921504A21Rik F | ACACAGCAAGAGAGGCAGTTTCAG  |
| lnc 4921504A21Rik R | GCAGCAGAAGGCAGGGTTCAC     |
| lnc Rsflos2 F       | CACGCATCTGGAGATCCCAAGTC   |
| lnc Rsflos2 R       | GGCTGTGTGAACCAAGGAGAAC    |
| lnc Cd55os F        | CAGCAGCAGTGGTGGTGATGAC    |
| lnc Cd55os R        | CCAAATCCTGGCATGGTCTCTTCC  |
| lnc Gm31786 F       | AAGCGGCATGATGGTTGGAAGAG   |
| lnc Gm31786 R       | GGGTGTGGCAGTAAAGGTGAAC TC |
| lnc 1700009J07Rik F | AGCCACCCTAAGCAAGCACATC    |
| lnc 1700009J07Rik R | AGCCTCCACATGACAGGACCAG    |
| lnc Tmem134 F       | AGCCTCCACATGACAGGACCAG    |
| lnc Tmem134 R       | ACAAAGAAGATGGCACTGGAGACAC |
| lnc Neat1 F         | TCCTCTCTGTGGTCTCACTCTTCC  |
| lnc Neat1 R         | ACTCCAGCACCAGCTCTACATCC   |
| lnc Meg3 F          | AGGGAAGCAGAGGTCGCCAAG     |
| lnc Meg3 R          | AGCACAGTGGAGCCAGGAGTC     |
| lnc Smim41 F        | CTGTCTTGCTGATGCGGTATCTG   |
| lnc Smim41 R        | ATGCTGGAACGTGTTGCTGGATGG  |
| lnc Gm6729 F        | TGCTGCCACCTGAGGAAGAC      |
| lnc Gm6729 R        | CTACGCTCTGTGTTGTCTCTGGAG  |

## Figures and Figure legends

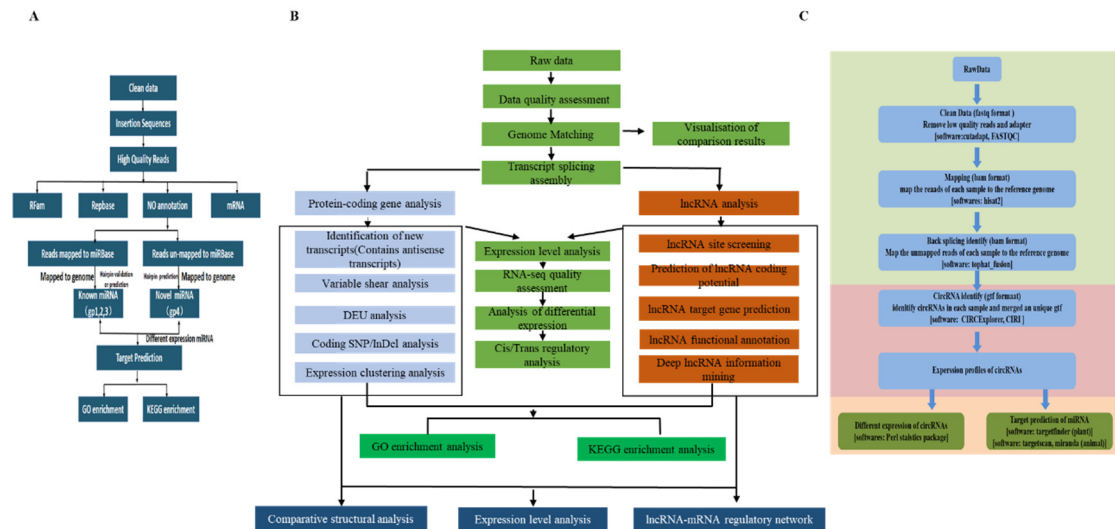

**Figure S1.** Bioinformatic methods for the analysis of mRNAs, miRNAs, circRNAs and lncRNAs

(A) Flow chart of differentially expressed miRNA analysis. (B) Flow chart of differentially expressed lncRNA and mRNA analysis. (C) Flow chart of differentially expressed circRNA analysis.
